# Supplementary material for: Hollow and mesoporous ZnTe microspheres: synthesis and visible-light photocatalytic reduction of carbon dioxide into methane
Source: Royal Society of Chemistry journal article supplement (doi:10.1039/c4ra13593h), 2014-12-15
Supplement: c4ra13593h1.pdf [file c4ra13593h1.pdf]

*Electronic Supplementary Information*

**Hollow and mesoporous ZnTe microspheres: synthesis and  
visible-light photocatalytic reduction of carbon dioxide into  
methane**

**Muhammad Fahad Ehsan,<sup>a,b</sup> Muhammad Naeem Ashiq<sup>a</sup> and Tao He<sup>\*a</sup>**

<sup>a</sup>National Center for Nanoscience and Technology, Beijing 100190, China

<sup>b</sup>University of Chinese Academy of Sciences, Beijing 100049, China

*RSC Advances*

\*Corresponding author

E-mail address: het@nanoctr.cn, Tel: +86-10-82545655

**Calculation Details of Solar Energy Conversion Efficiency**

**Gas Chromatographic Analysis**

**Stability Analysis**

### Calculation Details of Solar Energy Conversion Efficiency (%)

The amount of energy converted relative to the irradiated solar power in terms of conversion efficiency (%) can be calculated with the following formula:

$$\text{conversion efficiency (\%)} = \frac{\text{amount of energy converted (W)}}{\text{irradiated solar power (W)}} \times 100$$

(1)

The amount of energy converted was determined by the following formula:

$$\text{amount of energy converted} = \text{mass of } CH_4 \text{ produced (Kg)} \times \text{energy density of } CH_4 \left(\frac{W}{Kg}\right)$$

(2)

$$\text{mass of } CH_4 \text{ produced} = n[CH_4(\text{moles})] \times [M(\text{g.mole}^{-1})]$$

(3)

Where,  $n(CH_4)$  is the total amount of methane produced after 0.5 hours and  $M$  is the molecular weight of  $CH_4$ .

Putting the values obtained from the experimental results in eq. (3)

$$\text{mass of } CH_4 \text{ produced} = 1.89 \times 10^{-6} (\text{moles}) \times 16.04 (\text{g.mole}^{-1})$$

$$\text{mass of } CH_4 \text{ produced} = 3.03 \times 10^{-5} \text{ g} = 3.03 \times 10^{-8} \text{ Kg}$$

(4)

We already know that

$$\text{energy density of } CH_4 = 55.6 \left(\frac{MJ}{Kg}\right)$$

(5)

By putting Eq. (4) and Eq. (5) in Eq. (2)

$$\text{amount of energy converted} = 3.03 \times 10^{-8} (\text{Kg}) \times 55.6 \left(\frac{MJ}{Kg}\right)$$

$$\text{amount of energy converted} = 1.68 \times 10^{-6} (\text{MJ}) = 1.68 (\text{J})$$

$$\text{amount of energy converted (W)} = \frac{1.68 (\text{J})}{1800 (\text{s})} = 9.33 \times 10^{-4} (\text{W})$$

(6)

The power of the solar irradiation  $\lambda \geq 420 \text{ nm}$  was determined from ILT 950 Spectrodiometer (International Light Technologies) and is given as under:

$$\text{irradiated solar power (W)} = 1.3 \text{ W} \quad (7)$$

Putting the values from Eq. (6) and Eq. (7) in Eq. (1)

$$\text{conversion efficiency (\%)} = \frac{9.33 \times 10^{-4} (W)}{1.3 (W)} \times 100\%$$

*conversion efficiency (%) = 0.072 % (for hollow and mesoporous ZnTe microspheres)*

Similarly, the conversion efficiency was also calculated for ZnTe nanocrystals and the value has been given as following:

$$\text{conversion efficiency (\%)} = 0.034 \% \text{ (for ZnTe nanocrystals)}$$

### Gas Chromatographic Analysis

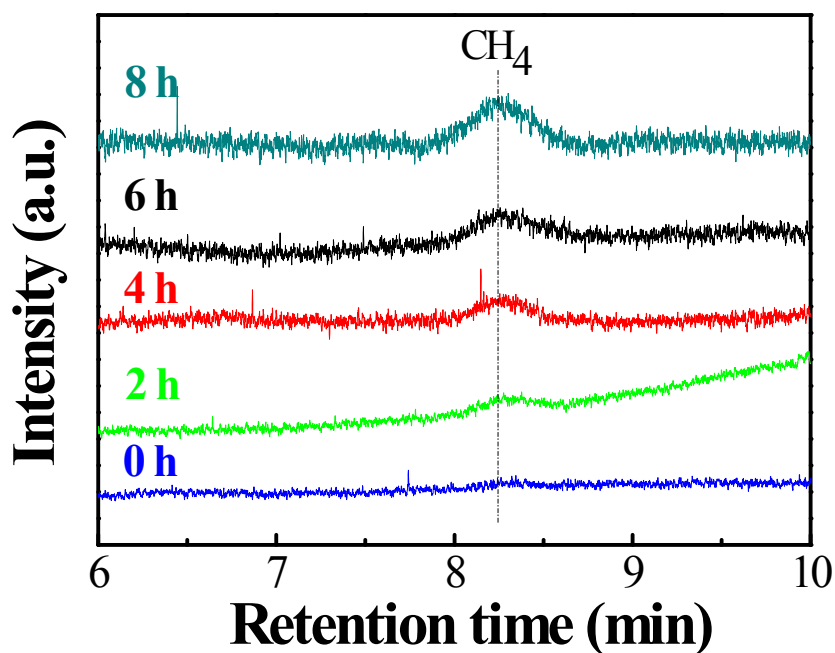

**Fig. S1** GC plots for the photoreduction of CO<sub>2</sub> into CH<sub>4</sub> over ZnTe hollow and mesoporous microspheres after different time intervals.

### Stability Analysis

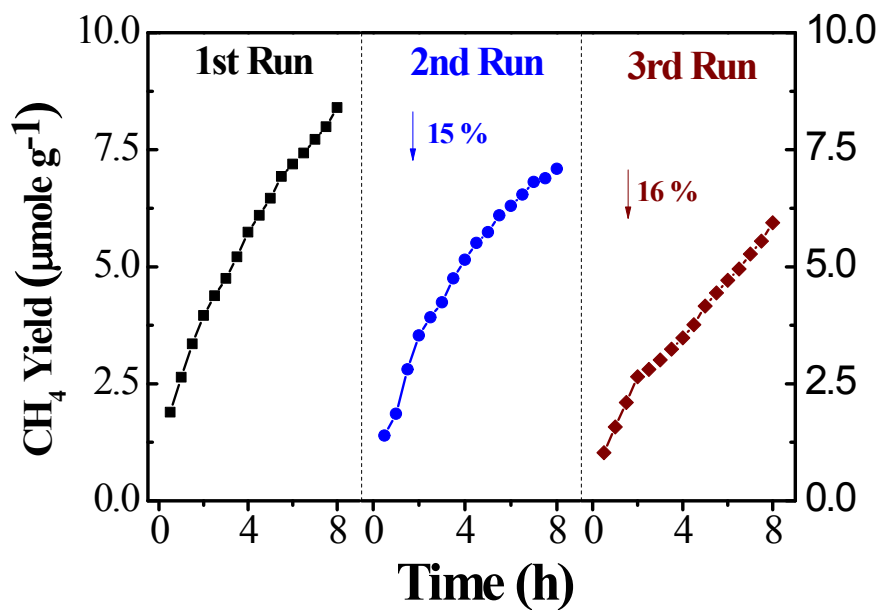

**Fig. S2** Various runs of CO<sub>2</sub> photoreduction for production of CH<sub>4</sub> over hollow and mesoporous ZnTe microspheres.
